# Supplementary material for: Mediation of Age and Thrombectomy Outcome by Neuroimaging Markers of Frailty in Patients With Stroke
Source: PubMed Central journal article supplement (PMC10762575; doi:10.1001/jamanetworkopen.2023.49628), 2024-01-02
Supplement: jamanetwopen-e2349628-s003.pdf [file jamanetwopen-e2349628-s003.pdf]

## Data Sharing Statement

Benali. Mediation of Age and Thrombectomy Outcome by Neuroimaging Markers of Frailty in Patients With Stroke. *JAMA Netw Open*. Published December 28, 2023.

doi:10.1001/jamanetworkopen.2023.49628

### Data

**Data available:** No

### Additional Information

**Explanation for why data not available:** The ESCAPE-NA1 data are not currently publicly available for distribution, but a future public data set may be made available. Researchers interested in the data are asked to contact the corresponding author with a proposal.
